# Supplementary material for: Achieving high field-effect mobility in CuSCN thin-film transistors with thiocyanate-functionalized polymers as fluorine-free dielectrics
Source: Royal Society of Chemistry journal article supplement (doi:10.1039/d5tc03581c), 2025-12-06
Supplement: d5tc03581c1.pdf [file d5tc03581c1.pdf]

## Electronic Supplementary Information

# Achieving high field-effect mobility in CuSCN thin-film transistors with thiocyanate-functionalized polymers as fluorine-free dielectrics

*Chitsanucha Chattakoonpaisarn,<sup>a</sup> Vatita Leamkaew,<sup>a</sup> Matilde Brunetta,<sup>b</sup> Sarah Fearn,<sup>b</sup> Patipan Sukpoonprom,<sup>a,d</sup> Taweesak Sudyoadsuk,<sup>c</sup> Vinich Promarak,<sup>a</sup> Nicola Gasparini,<sup>d</sup> Daniel Crespy,<sup>a,\*</sup> and Pichaya Pattanasattayavong<sup>a,\*</sup>*

<sup>a</sup> Department of Materials Science and Engineering, School of Molecular Science and Engineering, Vidyasirimedhi Institute of Science and Technology (VISTEC), Rayong 21210, Thailand

<sup>b</sup> Department of Materials, Imperial College London, London, SW7 2AZ, UK

<sup>c</sup> Frontier Research Center (FRC), Vidyasirimedhi Institute of Science and Technology (VISTEC), Rayong 21210, Thailand

<sup>d</sup> Department of Chemistry and Centre for Processable Electronics, Imperial College London, London, W12 0BZ, UK

\* Corresponding authors: daniel.crespy@vistec.ac.th, pichaya.p@vistec.ac.th

| Table of contents                                                                 | Page |
|-----------------------------------------------------------------------------------|------|
| <b>Supporting tables</b>                                                          |      |
| Table S1 Synthetic compositions and molecular weights of synthesized polymers     | S2   |
| Table S2 Calculations for preparing a homopolymer blend                           | S2   |
| Table S3 Summary of standard TFT parameters                                       | S3   |
| <b>Supporting figures</b>                                                         |      |
| Figure S1 Optical transmission and absorption spectra                             | S4   |
| Figure S2 Transfer characteristics of CuSCN transistors based on PS and PVBC      | S5   |
| Figure S3 Elemental profiles measured by secondary-ion mass spectrometry          | S6   |
| Figure S4 Transfer characteristics of a CuSCN transistor based on PVBC:PVBT blend | S7   |

**Table S1.** Compositions used for synthesizing thiocyanate-containing polymers, each with number and weight average molecular weight ( $M_n$  and  $M_w$ ) and molar weight distribution ( $MWD = M_w/M_n$ ).

| Entry                                           | PVBC  |      | KSCN  |      | $M_n$               | $M_w$               | MWD  |
|-------------------------------------------------|-------|------|-------|------|---------------------|---------------------|------|
|                                                 | mg    | mmol | mg    | mmol | g mol <sup>-1</sup> | g mol <sup>-1</sup> |      |
| PVBC                                            | -     | -    | -     | -    | 35,000              | 70,100              | 1.84 |
| P(VBC <sub>0.80</sub> -co-VBT <sub>0.20</sub> ) | 152.6 | 1.00 | 19.4  | 0.20 | 28,700              | 46,200              | 1.61 |
| P(VBC <sub>0.49</sub> -co-VBT <sub>0.51</sub> ) | 152.6 | 1.00 | 48.6  | 0.50 | 28,300              | 48,900              | 1.73 |
| PVBT                                            | 152.6 | 1.00 | 113.7 | 1.17 | 29,100              | 55,300              | 1.90 |

<sup>a</sup> Calculated from <sup>1</sup>H-NMR spectroscopy.

### Preparation of polymer blend

The homopolymer blend was prepared from the stock solution of each homopolymer (PVBC and PVBT) at 60 mg mL<sup>-1</sup>. Then, to obtain a precise mixture with Cl:SCN = 1:1 (mol:mol), the homopolymer solutions were mixed and yield a final solution of 935  $\mu$ L by the calculation listed in **Table S2**.

**Table S2.** Calculations for preparing the blend.

| Parameter                                             | PVBC   | PVBT   |
|-------------------------------------------------------|--------|--------|
| Molecular mass of monomer unit (g mol <sup>-1</sup> ) | 152.63 | 175.25 |
| Desired molar fraction                                | 0.50   | 0.50   |
| Corresponding measured weight fraction                | 0.47   | 0.53   |
| Volume used for preparing a mixture ( $\mu$ L)        | 435    | 500    |

### Standard TFT parameters

In the main text, TFT parameters were converted to capacitance-weighted parameters due to the difference in the dielectric constant for each polymer. **Table S3** below lists the standard TFT parameters including the hole mobility in saturation regime ( $\mu_{h,sat}$ ), threshold voltage ( $V_{th}$ ), subthreshold swing ( $S_{th}$ ) and on-off current ratio ( $I_{on}/I_{off}$ ).

**Table S3.** Summary of TFT parameters derived from forward scans of at least 8 devices for each polymer dielectric.

| Polymer dielectric                              | $\mu_{h,sat}$<br>( $\times 10^{-2} \text{ cm}^2 \text{ V}^{-1} \text{ s}^{-1}$ ) |      |      |      | $V_{th}$<br>(V) |     | $S_{th}$<br>(V dec <sup>-1</sup> ) |      |      | $I_{on}/I_{off}$<br>( $\times 10^3$ ) |     |     |
|-------------------------------------------------|----------------------------------------------------------------------------------|------|------|------|-----------------|-----|------------------------------------|------|------|---------------------------------------|-----|-----|
|                                                 | Max                                                                              | Avg  | SD   | Min  | Avg             | SD  | Min                                | Avg  | SD   | Max                                   | Avg | SD  |
| P(VBC <sub>0.80</sub> -co-VBT <sub>0.20</sub> ) | 1.84                                                                             | 1.66 | 0.12 | 18.9 | -19.4           | 0.3 | 4.06                               | 4.15 | 0.10 | 1.5                                   | 1.2 | 0.2 |
| P(VBC <sub>0.49</sub> -co-VBT <sub>0.51</sub> ) | 1.73                                                                             | 1.53 | 0.13 | 7.3  | -7.6            | 0.2 | 2.18                               | 2.50 | 0.18 | 2.2                                   | 1.8 | 0.2 |
| PVBT                                            | 3.01                                                                             | 2.63 | 0.36 | 1.9  | -2.7            | 0.5 | 1.94                               | 2.16 | 0.20 | 2.0                                   | 1.6 | 0.3 |

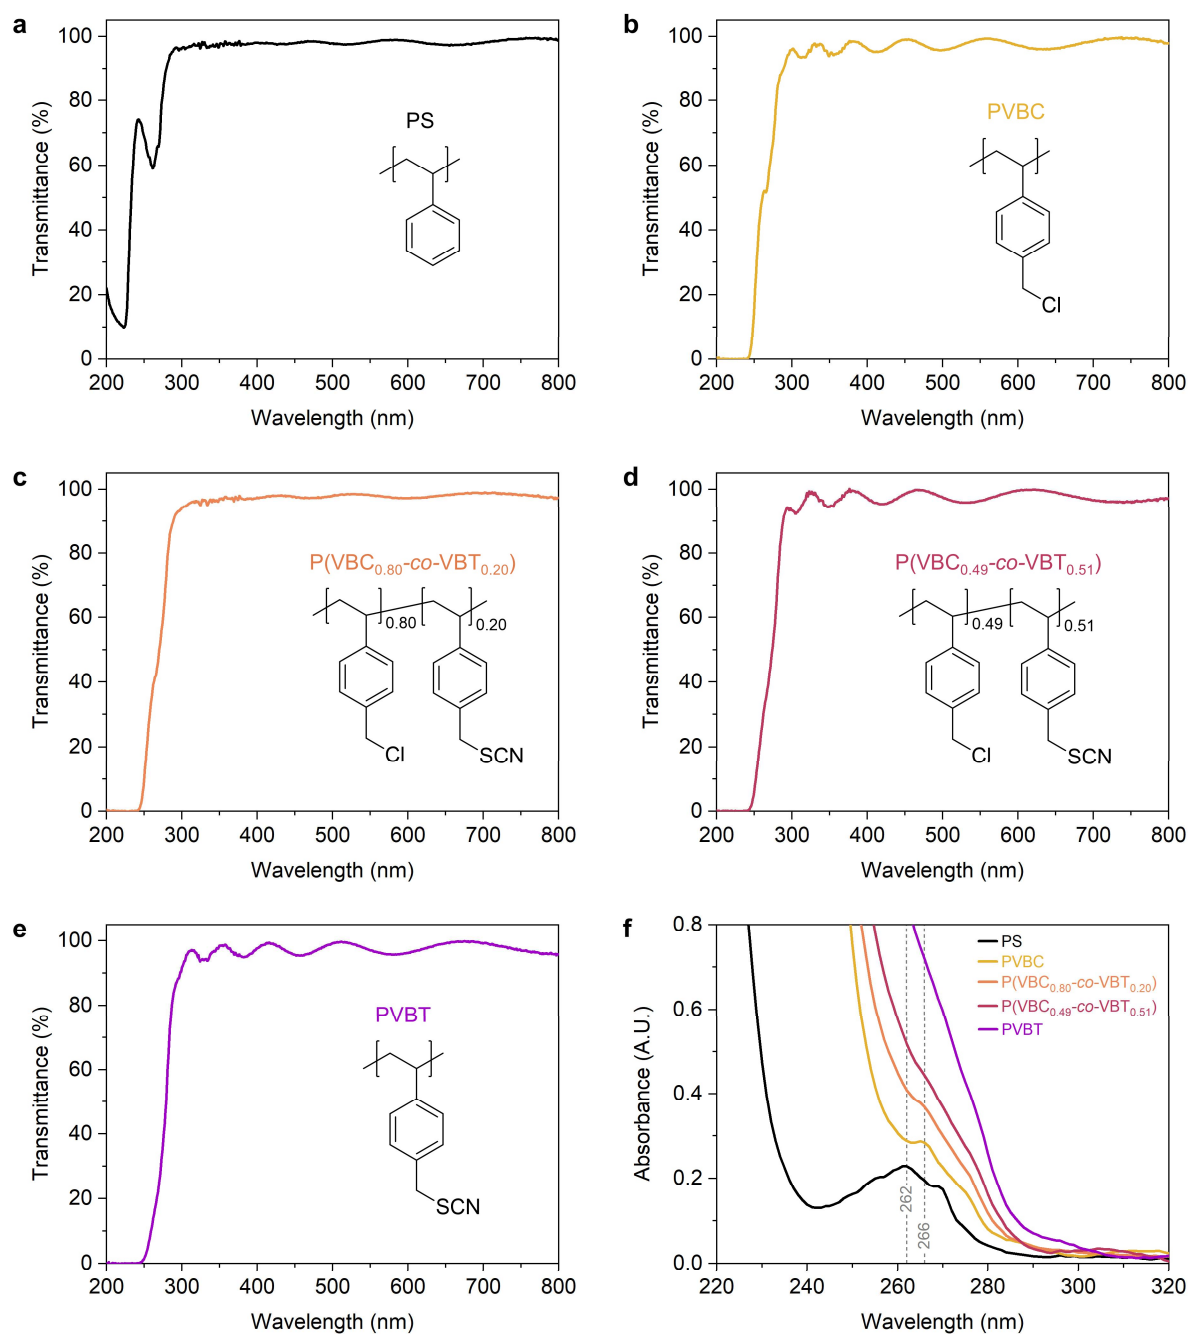

**Figure S1.** Optical transmittance of (a) PS, (b) PVBC, (c) P(VBC<sub>0.80</sub>-co-VBT<sub>0.20</sub>), (d) P(VBC<sub>0.49</sub>-co-VBT<sub>0.51</sub>), and (e) PVBT. (f) Comparison of spectra near the absorption edge.

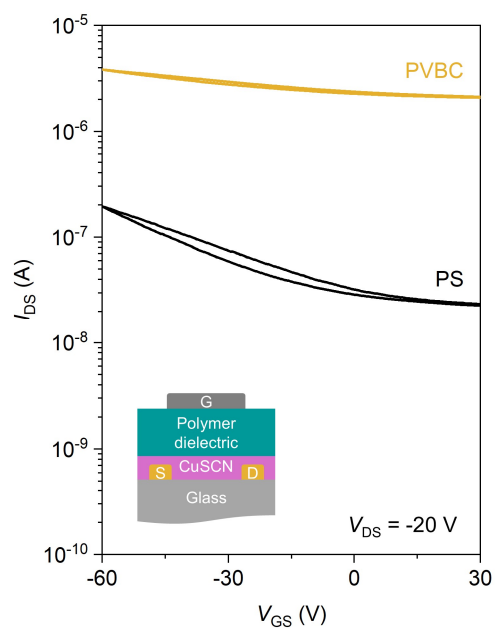

**Figure S2.** Transfer characteristics of CuSCN TFTs based on PS and PVBC dielectrics.

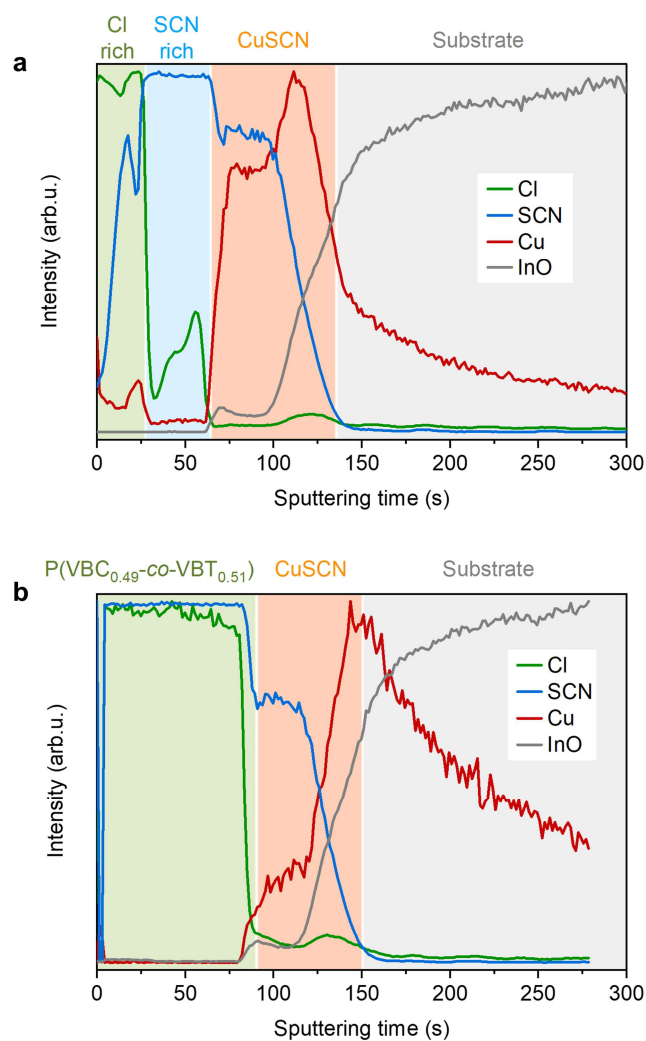

**Figure S3.** Elemental profiles measured by secondary-ion mass spectrometry (SIMS) of (a) a blend of homopolymers PVBC:PVBT at 0.47:0.53 by weight (equivalent to Cl:SCN of 1:1 molar ratio) and (b) the copolymer P(VBC<sub>0.49</sub>-co-VBT<sub>0.51</sub>). Films were spin-coated from solutions with a concentration of 60 mg mL<sup>-1</sup> in THF.

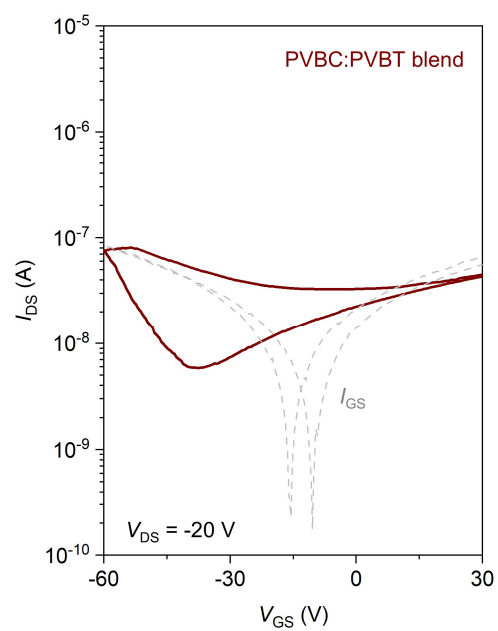

**Figure S4.** Transfer curve of a CuSCN TFT based on a homopolymer blend of PVBC:PVBT with a 0.47:0.53 weight ratio. The dielectric blend was spin-coated from a  $60 \text{ mg mL}^{-1}$  solution in THF.
